# Supplementary material
Source: PubMed Central journal article supplement (PMC2676566)
Supplement: NIHMS91088-supplement-2_si_002.pdf [file NIHMS91088-supplement-2_si_002.pdf]

**Supplemental Table S3.** Summary of N-terminal peptides and associated proteins of *Hfx. volcanii* detected by MS/MS<sup>1</sup>.

**Group I. N1 alone**

**Penultimate residue small (e.g., Gly, Ala, Pro, Val, Ser, Thr, Cys)**

|           |                                             |    |                          |
|-----------|---------------------------------------------|----|--------------------------|
| HVO_0028  | hypothetical protein                        | N1 | MTRAELEER                |
| HVO_0041  | argF ornithine carbamoyltransferase         | N1 | MLETHFTDIDDISASELDR      |
| HVO_0062  | dipeptide ABC transporter dipeptide-binding | N1 | MPDTNK                   |
| HVO_0196  | conserved hypothetical protein              | N1 | MADLIVK                  |
| HVO_0203  | rfcS replication factor C small subunit     | N1 | MSEAAESGDAPAGR           |
| HVO_0274  | conserved hypothetical protein              | N1 | MSGRKQGD SAVYAAAQGR      |
| HVO_0455  | cctB Thermosome subunit 2                   | N1 | MSQRMQQGQPMIIMGEDAQR     |
| HVO_0874  | epf mRNA 3''-end processing factor homolog  | N1 | MSSVDKQLENLK             |
| HVO_0887  | porB 2-oxoglutarate Fd oxidoreductase beta  | N1 | MSSNVR                   |
| HVO_0888  | porA 2-oxoglutarate Fd oxidoreductase       | N1 | MPADFNWAIGGEAGDGIDSTGK   |
| HVO_1009  | aad oxidoreductase                          | N1 | MSLDYRR                  |
| HVO_1054  | gatA Glutamyl-tRNA(Gln) amidotransferase    | N1 | MSLNAFITK                |
| HVO_1145  | RPS1A 30S ribosomal protein S3Ae            | N1 | MSERSVSKQKR              |
| HVO_1684  | thrS threonyl-tRNA synthetase               | N1 | MSDIAVILPDGTELSVEEGATVR  |
| HVO_1799  | FAD dependent oxidoreductase putative       | N1 | MTDNYDVI IAGAGPAGGQAAR   |
| HVO_1914  | 3-ketoacyl-CoA thiolase                     | N1 | MPVPVIAAAYR              |
| HVO_2110  | arcR transcription regulator                | N1 | MATNKPR                  |
| HVO_2158  | mdh nadp-dependent malic enzyme             | N1 | MTLGDDAR                 |
| HVO_2222  | ppiA peptidyl-prolyl cis-trans isomerase    | N1 | MSDNPTATLHTNKGDITVELFEDK |
| HVO_2564  | rplC ribosomal protein L3                   | N1 | MPQPSRPRKSGMGSFSPR       |
| HVO_2740  | ndk Nucleoside diphosphate kinase           | N1 | MSDAERTFVMVKPDGVQR       |
| HVO_A0266 | transcriptional regulator putative          | N1 | MVNSVLR LAMNER           |

**Penultimate residue other**

|           |                                           |    |                           |
|-----------|-------------------------------------------|----|---------------------------|
| HVO_0138  | tyrS tyrosyl-tRNA synthetase              | N1 | MDAYDLITR                 |
| HVO_0199  | pmm phosphoglucomutase/phosphomannomutase | N1 | MDEISFGTDGWR              |
| HVO_0435  | phosphoribosyl-ATP pyrophosphohydrolase   | N1 | MDADTPTDEVLDLDELFIATIESR  |
| HVO_0452  | leuS leucyl-tRNA synthetase               | N1 | MDYDPQLEAR                |
| HVO_0826  | TET aminopeptidase homolog                | N1 | MEFDVDR                   |
| HVO_1381  | mdmC caffeoyl-CoA O-methyltransferase     | N1 | MDILTDETR                 |
| HVO_1402  | pmu phosphomannomutase                    | N1 | MELFGTAGIR                |
| HVO_1568  | HydD putative                             | N1 | MDLDYGM LGGR              |
| HVO_1585  | acs Acetyl-coenzyme A synthetase          | N1 | MDVPDPTVVHEPDPAFVEDANVTR  |
| HVO_1678  | eIF-2 Translation initiation factor       | N1 | MDYDDQLDR                 |
| HVO_1896  | Ribosomal protein S24e                    | N1 | MDIEIISEEENPMLHR          |
| HVO_2091  | gabT 4-aminobutyrate aminotransferase     | N1 | MDRDSVEPTVTS LPGPK        |
| HVO_2554  | Chain J Trigger Factor Ribosome Binding   | N1 | MEALKADITKGVAR            |
| HVO_2601  | hit histidine triad protein               | N1 | MDQLFAPWR                 |
| HVO_2712  | RtcB RNA terminal phosphate cyclase oper  | N1 | METREFGDIELR              |
| HVO_2716  | acd Acyl-CoA dehydrogenase                | N1 | METVGSATGLTDEQR           |
| HVO_2790  | mrp Mrp protein homolog                   | N1 | MDEADVR                   |
| HVO_2796  | conserved hypothetical protein            | N1 | MDWPHDPDGEEGSEGGR         |
| HVO_2899  | conserved domain protein                  | N1 | MELAAIEDLIESHIEDADATVSRPR |
| HVO_A0286 | unknown                                   | N1 | MEFAIWAYPWDVLDAGPR        |
| HVO_B0268 | alkanal monooxygenase-like                | N1 | MDFSIVDLSPVPK             |
| HVO_0387  | conserved hypothetical protein            | N1 | MNDEELDEL R               |

|           |                                             |    |                             |
|-----------|---------------------------------------------|----|-----------------------------|
| HVO_0581  | cell division protein FtsZ                  | N1 | MQDIVREAMER                 |
| HVO_0790  | conserved hypothetical protein              | N1 | MNTDVGLSAR                  |
| HVO_0806  | pyk pyruvate kinase                         | N1 | MRNAKIVCTLGPASFDR           |
| HVO_0819  | sirR transcription repressor                | N1 | MLSDVMEDYLK                 |
| HVO_0973  | aspB aspartate aminotransferase             | N1 | MNFDFSDR                    |
| HVO_0999  | cobyrinic acid ac-diamide synthase          | N1 | MNTVLVSTSTGESTGK            |
| HVO_1082  | orotate phosphoribosyltransferase           | N1 | MKNVDDLIASAAELADR           |
| HVO_1099  | dapD 23 4 5-tetrahydropyridine-2-carboxy    | N1 | MNLESVDR                    |
| HVO_1198  | syrB universal stress protein               | N1 | MYSHILFPTDGSDCADAALDHAIEHAR |
| HVO_1344  | conserved hypothetical protein TIGR00291    | N1 | MISLDEAVTAR                 |
| HVO_1377  | Hypothetical UPF0145 protein                | N1 | MIVTTTETVIGR                |
| HVO_1380  | mcmA methylmalonyl-CoA mutase subunit alpha | N1 | MFDPELEEIR                  |
| HVO_1382  | alpha-NAC homolog                           | N1 | MFGGGGMNPR                  |
| HVO_1527  | glucose-1-phosphate thymidyltransferase     | N1 | MQAVVLAAGK                  |
| HVO_1830  | gndA 6-phosphogluconate dehydrogenase       | N1 | MQLGVIGLGR                  |
| HVO_2057  | glucose-1-phosphate thymidyltransferase     | N1 | MKGVLLSGGTGSR               |
| HVO_2068  | ftsZ cell division protein                  | N1 | MNVFCFGAGK                  |
| HVO_2313  | nirH heme biosynthesis protein              | N1 | MIQADADLSR                  |
| HVO_2373  | ribosomal protein S8.e                      | N1 | MKDQGRSK                    |
| HVO_2543  | rpmD ribosomal protein L30P                 | N1 | MQAIVQLR                    |
| HVO_2699  | bcp Bacterioferritin comigratory protein    | N1 | MLEPGDDAPDFELPDQHGDVLSLSDFR |
| HVO_2706  | eif2bd translation initiation factor eIF    | N1 | MIDETIEEIR                  |
| HVO_2869  | DNA binding domain similar to hmvng1864     | N1 | MYDLTGFQR                   |
| HVO_A0586 | rffH1 glucose-1-P thymidyltransferase       | N1 | MQTVILAAGR                  |
| HVO_B0064 | unknown                                     | N1 | MFGEYLTR                    |

## Group II. N2 and intermediates

### Penultimate residue small (e.g. Gly, Ala, Pro, Val, Ser, Thr, Cys)

|          |                                             |    |                           |
|----------|---------------------------------------------|----|---------------------------|
| HVO_0024 | tssB thiosulfate sulfurtransferase          | N2 | VDVVSPTWLADR              |
| HVO_0027 | transcription anti-termination factor       | N2 | SELLDTLRDDHETPLSR         |
| HVO_0069 | arylsulfatase                               | N2 | TAESPENVLVVMMDTVR         |
| HVO_0104 | radA DNA repair and recombination protein   | N2 | AEDDLESPLPGVGPATADK       |
| HVO_0107 | SUF system FeS assembly protein NifU family | N2 | GIGSDMYR                  |
| HVO_0118 | Ribosomal LX protein                        | N2 | SQFIITGSFTSR              |
| HVO_0123 | srp Signal recognition 54 kDa protein       | N2 | VLNLSGSSLRGSLDK           |
| HVO_0167 | ahcY adenosylhomocysteinase                 | N2 | SEHYAPVSEHLDDVEAAR        |
| HVO_0177 | arsC arsC protein                           | N2 | TDAADVVDADTDATTTTR        |
| HVO_0304 | etfA Electron transfer flavoprotein alpha   | N2 | SDVLAVVEHR                |
| HVO_0329 | ilvE branched-chain amino acid aminotran    | N2 | GFDEMDVSTIWQSGEYK         |
| HVO_0353 | ribosomal protein S23 (S12)                 | N2 | ANGKYAAR                  |
| HVO_0491 | Pyridoxamine 5'-phosphate oxidase family    | N2 | SLDQQTELSPEIR             |
| HVO_0541 | acnA aconitate hydratase 1                  | N2 | SDTETLDAIR                |
| HVO_0704 | dgs dolichol-P-glucose transferase          | N2 | SQSVGVVVPAYRPDPER         |
| HVO_0736 | Domain of unknown function DUF302 superf    | N2 | ALPIDPSAIKPEDIGEER        |
| HVO_0738 | conserved hypothetical protein              | N2 | ADEEAEAPAVELGTGASVEGAPLAR |
| HVO_0870 | proS prolyl-tRNA synthetase                 | N2 | SDEQELGITESK              |
| HVO_0880 | coiled-coil protein of COG 1340             | N2 | VTKQEVLSSEFDVQELDEAR      |
| HVO_1000 | acetyl-CoA synthetase                       | N2 | GELSELFAPNR               |
| HVO_1020 | PBS lyase HEAT-like repeat domain protein   | N2 | SDGDDTTTELSPEFDER         |
| HVO_1022 | nadh-dependent flavin oxidoreductase        | N2 | TDSLFTPLSLR               |

|           |                                             |       |                                        |
|-----------|---------------------------------------------|-------|----------------------------------------|
| HVO_1053  | gatC glutamyl-tRNA(Gln) amidotransferase    | N2    | SDTPVDADEV                             |
| HVO_1077  | conserved protein                           | N2    | TSEWVSLFSGGK                           |
| HVO_1132  | purA adenylosuccinate synthetase            | N2    | TVTIVGSQGLGDEGK                        |
| HVO_1174  | TFIIE alpha subunit                         | N2    | AFEELLNDPVIQK                          |
| HVO_1257  | moxR methanol dehydrogenase regulatory      | N2    | SDNPDRFGDDGQR                          |
| HVO_1311  | dehydrogenase putative (TBD)                | N2    | AFDDVDFEGR                             |
| HVO_1451  | Glutamate dehydrogenase                     | N2    | ASAAPSTATDDEPTEETALETAR                |
| HVO_1453  | gdhA Glutamate dehydrogenase                | N2    | AQEANPFESLQEQIDDAATYLDVR               |
| HVO_1492  | conserved hypothetical protein              | N2    | AHWTDSIVGDRMTVDR                       |
| HVO_1493  | conserved hypothetical protein              | N2    | PQIHLDDDETVAR                          |
| HVO_1506  | ilvC ketol-acid reductoisomerase            | N2    | TELTTEVYDDADR                          |
| HVO_1541  | glpK glycerol kinase                        | N2    | SGETYVGAIDQGTGTR                       |
| HVO_1595  | conserved hypothetical protein              | N2    | SDDTAPDENWQQQFDR                       |
| HVO_1626  | metallo-beta-lactamase                      | N2    | TVSDWSDWLPR                            |
| HVO_1745  | hypothetical protein                        | N2    | VAPISHADELDPFIALELPPGWVR               |
| HVO_1857  | conserved protein                           | N2    | SGSPDDERLEELR                          |
| HVO_1871  | Chlorite dismutase family                   | N2    | VEAPQTDEGWFALHDFR                      |
| HVO_1946  | translation initiation factor SUI1 putative | N2    | SEVCSTCGLPEELCVCEDVAK                  |
| HVO_1973  | conserved hypothetical protein              | N2    | TESESDTEAAEASER                        |
| HVO_2029  | trh transcription regulator AsnC family     | N2    | TYENLDSDLINALLEDGR                     |
| HVO_2256  | Protein of unknown function DUF262 family   | N2    | AIYVDDPLNSNDEDWDISK                    |
| HVO_2265  | hypothetical protein                        | N2    | TDDPEDIPDPVKPTTLQK                     |
| HVO_2300  | eif5A translation initiation factor eIF-5A  | N2    | AKEQKQVR                               |
| HVO_2371  | conserved hypothetical protein              | N2    | VVDSLSDGTR                             |
| HVO_2400  | conserved hypothetical protein              | N2    | SDLEIER                                |
| HVO_2413  | tuf translation elongation factor EF-1 s... | N2    | ADKPHQNLAIIGHVDHGK                     |
| HVO_2436  | tme nadp-dependent malic enzyme             | N2    | GLDDDSRKYHR                            |
| HVO_2452  | ribonucleoside-diphosphate reductase ade    | N2    | SDANLSTDELVLVVK                        |
| HVO_2557  | rpmC ribosomal protein L29                  | N2    | AIFYTEEIR                              |
| HVO_2558  | 30S ribosomal protein S3P                   | N2    | ADEHQFIENGLQR                          |
| HVO_2559  | rplV ribosomal protein L22                  | N2    | GINYSVEADPDTTAK                        |
| HVO_2624  | pyrG CTP synthase                           | N2    | PTDEYDPEMGRK                           |
| HVO_2677  | acetyltransferase (gnat) family             | N2    | AELQTQTVSSGK                           |
| HVO_2723  | snp snRNP homolog                           | N2    | SGRPLDVLEASLDEPVTVLLK                  |
| HVO_2737  | RPL8A 50S ribosomal protein L7Ae            | N2    | AVYVDFDVPADLADSAVEALEVAR               |
| HVO_2743  | methionine synthase vitamin-B12 independent | N2    | TELVSTTPGLYPLPDWAK                     |
| HVO_2753  | Domain of unknown function                  | N2    | SESEQR                                 |
| HVO_2758  | ribosomal protein L11                       | N2    | AGTIEVLVPGGK                           |
| HVO_2774  | eno phosphopyruvate hydratase               | N2    | TRITSVALR                              |
| HVO_2783  | rpsD ribosomal protein S4                   | N2    | TTGNNTKFYETPNHPFQGER                   |
| HVO_2945  | valS valyl-tRNA synthetase                  | N2    | PSGEYDPETVEAK                          |
| HVO_2961  | lpdA dihydrolipoamide dehydrogenase         | N2    | VVGDIAATGTELLVIGAGPGGYVAAIR            |
| HVO_2981  | upp uracil phosphoribosyltransferase        | N2    | PIEDRDDAYLITHALAK                      |
| HVO_A0406 | hypothetical protein                        | N2    | GLFDSGDVNPEAQR                         |
| HVO_A0472 | trxB2 thioredoxin reductase                 | N2    | ADVIVIGGGPAGLTTALFAAK                  |
| HVO_A0503 | amidohydrolase                              | N2    | TVLDWVDEPR                             |
| HVO_B0113 | Luciferase-like monooxygenase superfam.     | N2    | SDISFEYNVPVFAGAPDEGTEPTHR              |
| HVO_B0295 | ugpC sn-glycerol-3-phosphate transport      | N2    | SDITIQNLR                              |
| HVO_B0376 | oxidoreductase                              | N2    | TTLEDIDLDFVFPQGTGLQTSSELQFGTWR         |
| HVO_C0038 | hypothetical protein                        | N2    | TEYDEDSIPSHTLESNGR                     |
| HVO_0213  | Ferritin-like domain subfamily              | N1/N2 | MSEDVTALLK/SEDVTALLK                   |
| HVO_0313  | ATP synthase (E/31 kDa) subunit             | N1/N2 | MSLDNVVEDIR/SLDNVVEDIRDEAR             |
| HVO_0354  | rpsG ribosomal protein S7                   | N1/N2 | MSESDAPEPESPASSEAK/SESDAPEPESPASSEAK   |
| HVO_0359  | tuf translation elongation factor EF-1 s... | N1/N2 | MSDKPHQNLAIIGHVDHGK/SDKPHQNLAIIGHVDHGK |

|           |                                             |       |                                                          |
|-----------|---------------------------------------------|-------|----------------------------------------------------------|
| HVO_0711  | conserved hypothetical protein              | N1/N2 | MGLLDTISSLWK/GLLDTISSLWK                                 |
| HVO_0812  | ppsA phosphoenolpyruvate synthase           | N1/N2 | MAVVWLLDDVR/AVVWLLDDVR                                   |
| HVO_0964  | trxC thioredoxin                            | N1/N2 | MSDDELTDIR/SDELTDIRK                                     |
| HVO_1577  | imd inosine-5''-monophosphate dehydrogenase | N1/N2 | MSSIELTSSQKILTALINLYRSEDVAVK/SSELTSSQK                   |
| HVO_1699  | aminotransferase classes I and II superf    | N1/N2 | MTATFPGIPYLEWIVDR/TATFPGIPYLEWIVDR                       |
| HVO_1858  | Ribosomal protein S19e                      | N1/N2 | MVTIYDVPADALIEEVAGR/VTIYDVPADALIEEVAGR                   |
| HVO_1869  | hypothetical protein                        | N1/N2 | MSLIDFIR/SLIDFIR                                         |
| HVO_2361  | carB carbamoyl-phosphate synthase large     | N1/N2 | MTDEDSTGPGQEGTEDR/TDEDSTGPGQEGTEDR                       |
| HVO_2464  | sucD succinyl-CoA synthase alpha subunit    | N1/N2 | MSIFVDDDRVQVQGITGEGEK/SIFVDDDR                           |
| HVO_2547  | rpl32e ribosomal protein                    | N1/N2 | MSEITELEDISGVGPSK/SEEITELEDISGVGPSK                      |
| HVO_2577  | pyrF orotidine 5'-phosphate decarboxylase   | N1/N2 | MGFFDDLRL/GFFDDLRL                                       |
| HVO_2625  | guaA GMP synthase C-terminal domain         | N1/N2 | MVNVDEFIEDATASIR/VNVDEFIEDATASIR                         |
| HVO_A0377 | hydantoin racemase putative                 | N1/N2 | MTEILWVDPVGHDDFSGDIEALLQNAAR/TEILWVDPVGHDDFSGDIEALLQNAAR |
| HVO_A0488 | cobO cob(I)alamin adenosyltransferase       | N1/N2 | MTDAPDGTTPETGDETTTPDSVR/TDAPDGTTPETGDETTTPDSVR           |

### **Penultimate residue other**

|           |                                           |       |                                 |
|-----------|-------------------------------------------|-------|---------------------------------|
| HVO_1238  | oxidoreductase aldo/keto reductase family | N2    | EYTTLGDTGMEVSR                  |
| HVO_1824  | RecJ-like exonuclease                     | N2    | EDELIDSSQLSLPR                  |
| HVO_B0167 | narJ chaperonin-like protein              | N2    | DTNTNAERTTDDTNRDTR              |
| HVO_1654  | cysK Cysteine synthase                    | N1/N2 | MDSILDIAIGSPLVR/DDSILDIAIGSPLVR |
| HVO_1443  | ABC transporter ATP-binding protein       | N2    | ITVENLR                         |
| HVO_2621  | ppc phosphoenolpyruvate carboxylase       | N2    | WYSYSSMR                        |
| HVO_A0529 | ilvB3 acetolactate synthase large         | N2    | NTSERLVESLERLGVSR               |

## **Group III. Ac1 and intermediates**

### **Penultimate residue small (e.g., Gly, Ala, Pro, Val, Ser, Thr, Cys)**

|           |                                              |        |                                                   |
|-----------|----------------------------------------------|--------|---------------------------------------------------|
| HVO_0133  | cctA Thermosome subunit 1                    | Ac1    | Ac-MSQRMQQGQPMIILGEDSQR                           |
| HVO_0424  | rli RNase L inhibitor homolog                | Ac1    | Ac-MADDSIAVVLDLR                                  |
| HVO_0481  | gap glyceraldehyde-3-phosphate dehydrogenase | Ac1    | Ac-MSEKSYLSAGENVDES DVVR                          |
| HVO_0827  | conserved protein                            | Ac1    | Ac-MSDTESQLR                                      |
| HVO_1164  | HD domain protein                            | Ac1    | Ac-MSDTEDTLNGGR                                   |
| HVO_1716  | exsB protein                                 | Ac1    | Ac-MTTEPTSDDK                                     |
| HVO_2598  | ppk polyphosphate kinase                     | Ac1    | Ac-MSDDEVRRGGDSQGR                                |
| HVO_2779  | rpl18e Chain O                               | Ac1    | Ac-MSKTNPRLNLSIAELK                               |
| HVO_2902  | gatE glutamyl-tRNA(Gln) amidotransferase     | Ac1    | Ac-MTEYDYDYEDLGLVAGLEIHQQLDTETK                   |
| HVO_A0021 | unknown                                      | Ac1    | Ac-MANYEVIERVVVDRWGDEEGR                          |
| HVO_B0053 | hypothetical protein                         | Ac1    | Ac-MACAELEALR                                     |
| HVO_C0043 | hypothetical protein                         | Ac1    | Ac-MTDDGLVMER                                     |
| HVO_0536  | Nutrient-stress induced DNA binding prot     | Ac1/N1 | Ac-MSTQKSVLKEAGSVGDNPVRLDTEK/MSTQKSVLKEAGSVGDNPVR |
| HVO_2336  | pyridoxine biosynthesis protein              | Ac1/N1 | Ac-MPEETDLEELR/MPEETDLEELR                        |
| HVO_B0117 | unknown                                      | Ac1/N1 | Ac-MGTDQSTNRR/MGTDQSTNR                           |
| HVO_B0217 | livK-2 branched-chain amino acid ABC         | Ac1/N1 | Ac-MTDQPALTDERSR/MTDQPALTDERSR                    |

### **Penultimate residue NatB-like (e.g., Asp, Glu, Asn, Met)**

|           |                                     |        |                                    |
|-----------|-------------------------------------|--------|------------------------------------|
| HVO_1120  | conserved hypothetical protein      | Ac1    | Ac-MDDDDPRRRPR                     |
| HVO_2923  | psmC Proteasome subunit alpha2      | Ac1    | Ac-MNRNDKQAYDR                     |
| HVO_B0045 | L-2,4-diaminobutyrate decarboxylase | Ac1    | Ac-MNGVGDVDGERR                    |
| HVO_0572  | lpl lipocate protein ligase         | Ac1/N1 | Ac-MNDSQGSIA DREWRVIR/MNDSQGSIA DR |

### **Penultimate residue other**

|          |                                   |     |                       |
|----------|-----------------------------------|-----|-----------------------|
| HVO_1967 | pgi glucose-6-phosphate isomerase | Ac1 | Ac-MQVDLGNVLDTPAHGVSR |
|----------|-----------------------------------|-----|-----------------------|

## Group IV. Ac1 and N2 isoforms and intermediates

### Penultimate residue small (e.g., Gly, Ala, Pro, Val, Ser, Thr, Cys)

|          |                                            |           |                                                 |
|----------|--------------------------------------------|-----------|-------------------------------------------------|
| HVO_0291 | conserved protein                          | Ac1/N2    | MSSNEIPTREVAR/SSNEIPTREVAR                      |
| HVO_1250 | thiol-disulfide isomerase/thioredoxin      | Ac1/N2    | Ac-MVLLSDSELER/VLLEDSELER                       |
| HVO_1560 | Uncharacterized protein conserved          | Ac1/N2    | MSNYLVAMEAAWLVR/SNYLVAMEAAWLVR                  |
| HVO_2056 | spsK spore coat polysaccharide synthesis   | Ac1/N2    | Ac-MPNIHDVEVR/PNIHDVEVRDLQVNADQR                |
| HVO_2809 | sdhB succinate dehydrogenase chain B hom   | Ac1/N2    | Ac-MSTQVPETVEEESATEAASAGK/STQVPETVEEESATEAASAGK |
| HVO_0628 | dppD dipeptide ABC transporter ATP-binding | Ac1/N1/N2 | Ac-MSQDGNVSR/MSQDGNVSR/SQDGNVSR                 |
| HVO_0783 | ATP-dependent protease Lon protease        | Ac1/N1/N2 | Ac-MSNDTNTDDSLHER/MSNDTNTDDSLHER/SNDTNTDDSLHER  |
| HVO_2959 | 2-oxoacid decarboxylase E1 beta chain      | Ac1/N1/N2 | Ac-MSSQNLTIQAVR/MSSQNLTIQAVR/SSQNLTIQAVR        |

### Penultimate residue other

|          |                                |        |                                     |
|----------|--------------------------------|--------|-------------------------------------|
| HVO_1091 | psmA proteasome subunit alpha1 | Ac1/N2 | Ac-MQQAQQQAYDR/QQAQQQAYDRGITIFSPDGR |
|----------|--------------------------------|--------|-------------------------------------|

## Group V. Ac2 and intermediates

### Penultimate residue small/NatA-like (e.g., Gly, Ala, Pro, Val, Ser, Thr, Cys)

|                      |                                             |           |                                                                                       |
|----------------------|---------------------------------------------|-----------|---------------------------------------------------------------------------------------|
| HVO_0070             | NifU-like domain protein                    | Ac2       | Ac-STETQDGEDDLKER                                                                     |
| HVO_0116             | Ribosomal protein L31e                      | Ac2       | Ac-SANDFEER                                                                           |
| HVO_0778             | cctA Thermosome subunit 3                   | Ac2       | Ac-ASRMQQPLYILAEGTNRTHGR                                                              |
| HVO_0862             | conserved hypothetical protein              | Ac2       | Ac-SVGYQVSSDHQLAR                                                                     |
| HVO_1804             | nadC nicotinate phosphoribosyltransferase   | Ac2       | Ac-SDFDIVGPEAIR                                                                       |
| HVO_2226             | trpD anthranilate phosphoribosyltransferase | Ac2       | Ac-AVVESEFGWPLKR                                                                      |
| HVO_2348             | conserved hypothetical protein TIGR00294    | Ac2       | Ac-SHQLPDVQASQPDVTVGLSQQVGTGVEK                                                       |
| HVO_2506             | Isopentenyl-diphosphate delta-isomerase     | Ac2       | Ac-SNAAADEATELHK                                                                      |
| HVO_2550             | rpsN ribosomal protein S14p/S29e            | Ac2       | Ac-SDSETEQTGEHASR                                                                     |
| HVO_2551             | rpl5p ribosomal protein L5.                 | Ac2       | Ac-SEADFHEMR                                                                          |
| HVO_2562             | rplW ribosomal protein L23                  | Ac2       | Ac-SIIIEHPLVTEKAMNQMFDFNK                                                             |
| HVO_A0520-TG_gha_452 | uncharacterized domain 1 putative           | Ac2       | Ac-SEQDDYAEIRER                                                                       |
| HVO_C0074-TG_gha_454 | dppF dipeptide ABC transp. ATP-binding      | Ac2       | Ac-SVVSEHTSQQDGR                                                                      |
| HVO_0316             | ATP synthase archaeal A subunit             | Ac2/N1    | Ac-SQATQDSVREDGVIASVSGPVVTAR/MSQATQDSVR                                               |
| HVO_0551             | mutL-2 DNA mismatch repair protein mutL     | Ac2/N1    | Ac-SDIKQLDEK/MSDIKQLDEKTVQR                                                           |
| HVO_0979             | ndhG nadh dehydrogenase/oxidoreductase      | Ac2/N1    | Ac-SSEQKPFVTDVDTQVQTETR/MSSEKPFVTDVDTQVQTETR                                          |
| HVO_0729             | ppa inorganic pyrophosphatase               | Ac2/N2    | Ac-VNLWEDMETGPNAPDEIYAVVECLK/VNLWEDMETGPNAPDEIYAVVECLK                                |
| HVO_0861             | sufB/sufD domain protein                    | Ac2/N2    | Ac-SAQLPANLSAETVR/SAQLPANLSAETVR                                                      |
| HVO_0884             | aldehyde reductase                          | Ac2/N2    | Ac-TENLASADDAPR/TENLASADDAPR                                                          |
| HVO_1637             | slyD peptidyl-prolyl cis-trans isomerase    | Ac2/N1/N2 | Ac-SDEQQAAEQVDVEEVESGIQDGFVR/MSDEQQAAEQVDVEEVESGIQDGFVR/<br>SDEQQAAEQVDVEEVESGIQDGFVR |
| HVO_2126             | oligopeptide ABC transporter oligopeptid    | Ac2/N1    | Ac-SDDNITEVNMDR/MSDDNITEVNMDR                                                         |
| HVO_2600             | map methionine aminopeptidase type II       | Ac2/N2    | Ac-SIGPLDDETVEK/SIGPLDDETVEK                                                          |
| HVO_2620             | rieske 2Fe-2S domain protein                | Ac2/N1    | Ac-SDSKYPADSGR/MSDSKYPADSGR                                                           |
| HVO_2757             | L1P family of ribosomal proteins            | Ac2/N1/N2 | Ac-ADTIVDAVSR/MADTIVDAVSR/ADTIVDAVSR                                                  |
| HVO_A0378            | hydantoin utilization protein B             | Ac2/N2    | Ac-STHDVDPATVEVIR/STHDVDPATVEVIR                                                      |

### Penultimate residue other

|                      |                                          |        |                               |
|----------------------|------------------------------------------|--------|-------------------------------|
| HVO_0662             | DNA binding protein                      | Ac2    | Ac-KFIEEIVVDAFLPTFRALLAEDLRDR |
| HVO_1308             | aroA 3-phosphoshikimate 1-carboxyvinyltr | Ac2    | Ac-DAHVTPSR                   |
| HVO_1497             | FruB phosphocarrier protein Hpr          | Ac2    | Ac-ERTVTVVPEGLHARPASK         |
| HVO_2486             | bccA biotin carboxylase                  | Ac2    | Ac-FSKVLVANR                  |
| HVO_C0075-TG_gha_454 | oligopeptide/dipeptide ABC transporter   | Ac2    | Ac-QYELAMSDTALDRR             |
| HVO_2242             | eif probable translation initiation fact | Ac2/N1 | Ac-EYQTALDR/MEYQTALDR         |

|                                                |                                |
|------------------------------------------------|--------------------------------|
| HVO_A0571 hydrolase isochorismatase family     | Ac2/N1 Ac-LDATASQAK/MLDATASQAK |
| HVO_B0112 mandelate racemase/muconate lactoniz | Ac2/N1 Ac-EITDISATK/MEITDISATK |

### Group V. Ac1 and Ac2 isoforms and intermediates

#### **Penultimate residue small (e.g., Gly, Ala, Pro, Val, Ser, Thr, Cys) includes NatA-like Ac2 forms**

|                                               |                                                                                                       |
|-----------------------------------------------|-------------------------------------------------------------------------------------------------------|
| HVO_0136 translation initiation factor eIF-1A | Ac1/Ac2 Ac-MSDDENESR, Ac-SDDENESRR                                                                    |
| HVO_0860 sufB FeS assembly protein SufB       | Ac1/Ac2/N1 Ac-MSSDQDHLKETDTEAR/Ac-SSDQDHLKETDTEAR/MSSDQDHLK                                           |
| HVO_1396 P-hydroxybenzoate hydroxylase        | Ac1/Ac2/N1 Ac-MSTDENDTAEDSSASPR/ Ac-STDENDTAEDSSASPR/MSTDENDTAEDSSASPR                                |
| HVO_1545 dihydroxyacetone kinase L subunit    | Ac1/Ac2/N1 Ac-MADAETQREAVLDALDNVAER/Ac-ADAETQR/ADAETQREAVLDALDNVAER                                   |
| HVO_2784 rpsM ribosomal protein S13p/S18e     | Ac1/Ac2/N1/N2 Ac-MSAEEPQDSSPEEEEDLRYFIR/Ac-SAEEPQDSSPEEEEDLR/<br>MSAEEPQDSSPEEEEDLR/SAEEPQDSSPEEEEDLR |

<sup>1</sup>Abbreviations: N1, protein retaining its initiator methionine; Ac1, protein with an N<sup>α</sup>-acetyl group on its initiator methionine; N2, protein with its initiator methionine removed; Ac2, protein with its initiator methionine removed and an N<sup>α</sup>-acetyl group on the exposed penultimate residue.
